# Supplementary material
Source: publisher figshare collection journal article supplement (https://frontiersin.figshare.com/ndownloader/files/31807865)
Supplement: Supplementary file [file 31807865]

## Supplementary Material

Supplementary Table 1. Mean GSRS scores of IBS patients (MIBS cohort) and healthy subjects (MIBS cohort and biopsy study).

|                                | IBS patients (MIBS) |                 |                 | Healthy subjects (MIBS) |                 |                 | Healthy subjects (biopsy study) |                 |
|--------------------------------|---------------------|-----------------|-----------------|-------------------------|-----------------|-----------------|---------------------------------|-----------------|
|                                | Young adults        | Middle-aged     | Elderly         | Young adults            | Middle-aged     | Elderly         | Young adults                    | Elderly         |
| N                              | 191                 | 209             | 63              | 90                      | 84              | 43              | 52                              | 48              |
| Abdominal pain (mean $\pm$ SD) | 3.64 $\pm$ 1.22***  | 3.19 $\pm$ 1.18 | 2.91 $\pm$ 1.18 | 1.93 $\pm$ 0.81***      | 1.49 $\pm$ 0.62 | 1.37 $\pm$ 0.42 | 2.03 $\pm$ 0.70***              | 1.43 $\pm$ 0.61 |
| Reflux (mean $\pm$ SD)         | 2.16 $\pm$ 1.36     | 2.23 $\pm$ 1.44 | 1.98 $\pm$ 1.34 | 1.24 $\pm$ 0.51         | 1.20 $\pm$ 0.57 | 1.22 $\pm$ 0.48 | 1.29 $\pm$ 0.60                 | 1.19 $\pm$ 0.60 |
| Diarrhoea (mean $\pm$ SD)      | 3.83 $\pm$ 1.54**   | 3.16 $\pm$ 1.51 | 3.07 $\pm$ 1.51 | 1.51 $\pm$ 0.74         | 1.32 $\pm$ 0.50 | 1.36 $\pm$ 0.59 | 1.54 $\pm$ 0.79                 | 1.46 $\pm$ 0.66 |
| Indigestion (mean $\pm$ SD)    | 4.21 $\pm$ 1.26     | 3.99 $\pm$ 1.32 | 3.75 $\pm$ 1.48 | 2.22 $\pm$ 0.85*        | 1.94 $\pm$ 0.91 | 1.75 $\pm$ 0.85 | 2.26 $\pm$ 0.79***              | 1.67 $\pm$ 0.78 |
| Constipation (mean $\pm$ SD)   | 3.49 $\pm$ 1.42     | 3.12 $\pm$ 1.39 | 3.03 $\pm$ 1.22 | 1.66 $\pm$ 0.91         | 1.58 $\pm$ 0.79 | 1.57 $\pm$ 0.82 | 1.62 $\pm$ 0.72                 | 1.49 $\pm$ 0.73 |

\*  $P < 0.05$  \*\*  $P < 0.01$  \*\*\*  $P < 0.001$  (vs elderly for MIBS cohort)

SD = standard deviation

Independent t-tests were used for comparison of mean GSRS scores per age group

MIBS age groups: 18-39 years (young adults), 40-64 years (middle-aged adults), 65-75 years (elderly)

Biopsy study age groups: 40-64 years (middle-aged adults), 65-75 years (elderly)

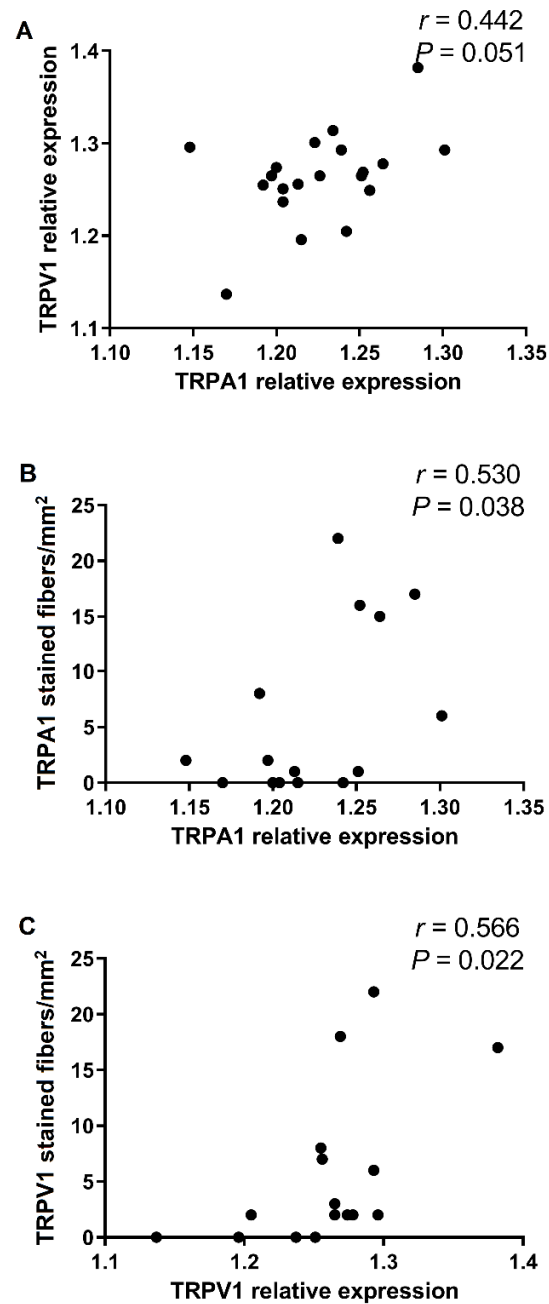

Supplementary Figure 1 (panel A-C). Panel A: Correlation between TRPA1 relative expression and TRPV1 relative expression. Panel B: Correlation between TRPA1 immunoreactivity (mean number of stained fibers per mm<sup>2</sup> of lamina propria) and TRPV1 relative expression. Panel C: Correlation between TRPV1 immunoreactivity and TRPV1 relative expression.

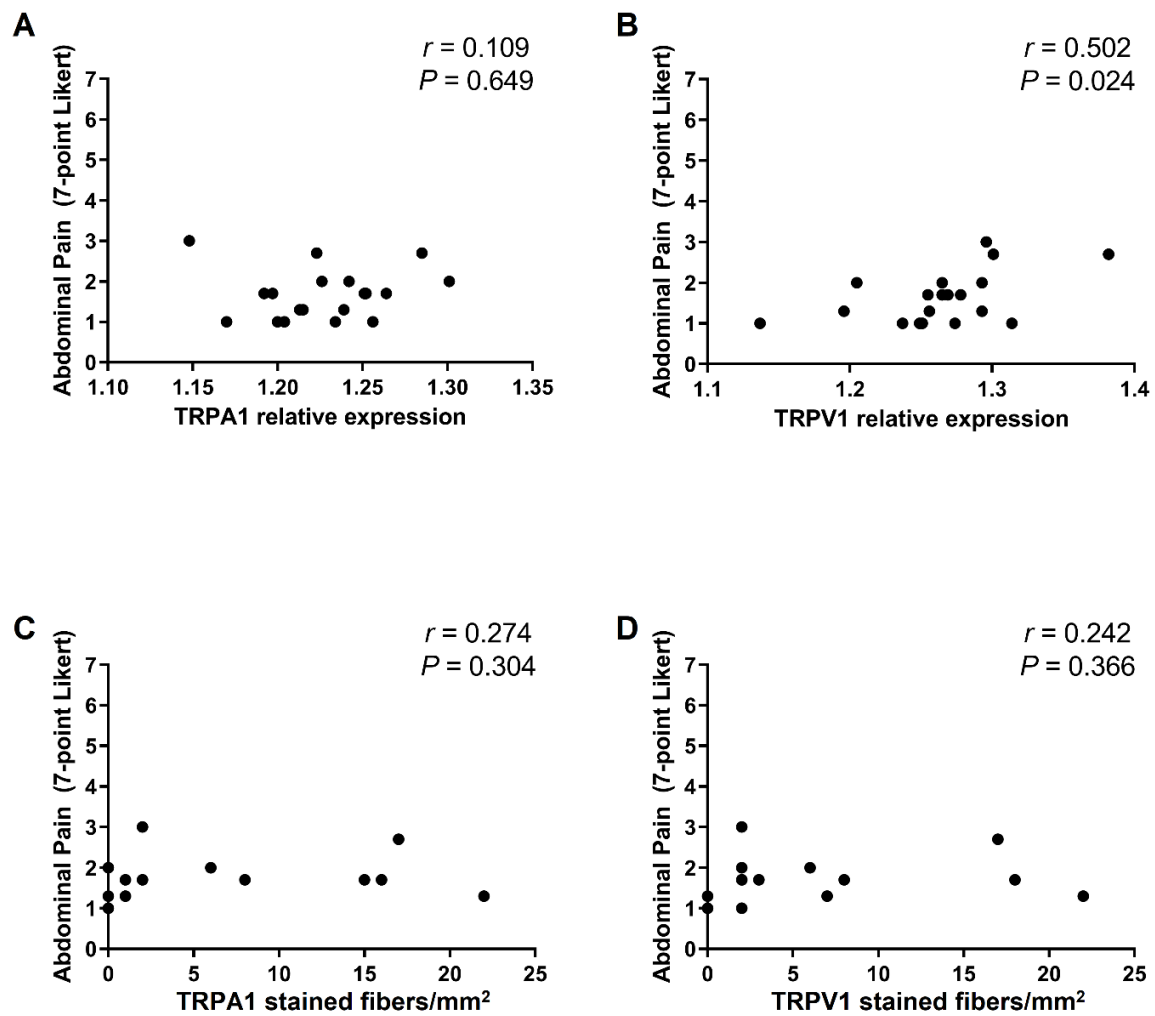

Supplementary Figure 2 (panel A-D). Correlation between abdominal pain and A) TRPA1 relative expression, B) TRPV1 relative expression, C) TRPA1 immunoreactivity (mean number of stained fibers per mm<sup>2</sup> of lamina propria) and D) TRPV1 immunoreactivity.
